# Supplementary material
Source: MDPI journal article supplement (https://www.mdpi.com/2072-4292/14/1/108)
Supplement: s1 [file s1]

Archive with 3 entries (3 files):
- Supplementary Figures.pdf
- Table S1. Weather conditions during flight days (data from the Fitterizzi weather station). Highlighted lines refer to the hours when the flights are performed..pdf
- Table S2. Results Summary.pdf
